1 Age dependent changes in synaptic NMDA receptor composition in adult human cortical  
2 neurons.

3 Pegasiou C.M.<sup>1,2</sup>, Zolnourian A.<sup>3,4</sup>, Gomez-Nicola D.<sup>1</sup>, Deinhardt, K.<sup>1</sup>, Nicoll J.A.R.<sup>2,5</sup>, Ahmed A.<sup>3,4</sup>,  
4 Vajramani G.<sup>3</sup>, Grundy P.<sup>3</sup>, Verhoog, M.B.<sup>6,7</sup>, Mansvelder, H.D.<sup>6</sup>, Perry V.H.<sup>1,8</sup>, Bulters D.<sup>3,4</sup>, Vargas-  
5 Caballero M.<sup>1,2</sup>

6

7 Author affiliations

8 <sup>1</sup>School of Biological Sciences, University of Southampton

9 <sup>2</sup>Institute for Life Sciences, University of Southampton.

10 <sup>3</sup>Department of Neurosurgery, University Hospital Southampton, Wessex Neurological Centre.

11 <sup>4</sup>Clinical Neurosciences, Clinical and Experimental Sciences, Faculty of Medicine, University of  
12 Southampton UK

13 <sup>5</sup>Department of Cellular Pathology, University Hospital Southampton NHS Foundation Trust,  
14 Southampton, UK

15 <sup>6</sup>Department of Integrative Neurophysiology, Center for Neurogenomics and Cognitive Research,  
16 Neuroscience Amsterdam, VU University Amsterdam, The Netherlands

17 <sup>7</sup>Present address: Division of Cell Biology, Department of Human Biology, Neuroscience Institute,  
18 Faculty of Health Sciences, University of Cape Town, Cape Town, South Africa

19

20 Corresponding author:

21 Dr. Mariana Vargas-Caballero

22

23

## 24 Abstract

25 The molecular processes underlying the ageing-related decline in cognitive performance and  
26 memory observed in humans are poorly understood. Studies in rodents have shown that N-  
27 methyl-D-aspartate receptors (NMDARs) containing GluN2B subunits can enhance the ability of  
28 synapses to undergo long term potentiation. In ageing rodents, the contribution of GluN2B to  
29 synaptic function is reduced compared to younger animals and the decline in GluN2B subunit  
30 expression is correlated with impaired memory functions. However, the contribution of GluN2B  
31 containing receptors to synaptic transmission in cortical synapses has not been previously studied.  
32 We investigated the synaptic contribution of GluN2A and GluN2B containing NMDARs in adult  
33 human neurons using fresh non-pathological temporal cortical tissue resected during  
34 neurosurgical procedures. The tissue we obtained fulfilled quality criteria by the absence of  
35 inflammation markers and proteomic degradation. We show an age-dependent decline in the  
36 NMDA/AMPA receptor ratio in adult human temporal cortical synapses. We demonstrate that  
37 GluN2B containing NMDA receptors contribute to synaptic responses in the adult human brain  
38 with a reduced contribution in older individuals. With previous evidence demonstrating the critical  
39 role of synaptic GluN2B in regulating synaptic strength and memory storage in mice, this  
40 progressive reduction of GluN2B in the human brain during aging may underlie a molecular  
41 mechanism in the age-related decline in cognitive abilities and memory observed in humans.

42

## 43 Introduction

44 Glutamate is the neurotransmitter of cortical and hippocampal pyramidal neurons and thus is a  
45 mediator cognitive functions. Glutamate-gated receptors of the NMDA subtype require  
46 intracellular depolarisation to relieve voltage-dependent extracellular  $Mg^{2+}$  block of the ion  
47 channel pore. Once opened, NMDAR channels can allow  $Ca^{2+}$  influx which triggers the synaptic

48 plasticity processes thought to support many forms of learning and memory (Bliss and  
49 Collingridge, 1993; Takeuchi et al., 2013). NMDARs are tetrameric ion channels containing 2  
50 GluN1 (obligatory) subunits and 2 GluN2 subunits, which in the adult forebrain most commonly  
51 comprise GluN1/GluN2A, GluN1/GluN2B diheteromers, and GluN1/GluN2A/GluN2B  
52 triheteromers (Rauner and Köhr, 2011; Paoletti et al. 2013; Stroebel et al. 2018). Furthermore, a  
53 short primate-specific GluN2A isoform (GluN2A-S) forms functional NMDAR together with GluN1  
54 and accounts for one third of the total GluN2A protein in adult human cortex as recently described  
55 by us (Warming et al, 2019).

56  
57 The subunit composition of NMDA receptors (NMDARs) determines their ion channel properties  
58 (Vicini et al., 1998), and protein-protein interactions with downstream molecular cascades that  
59 are linked to plasticity, survival and excitotoxicity (Hardingham and Bading, 2010; Lussier et al.,  
60 2015). Synaptic localisation of distinct NMDAR subunits is highly regulated by neurons and  
61 undergoes marked developmental changes in rodent neocortex with a switch from GluN2B to  
62 GluN2A rich synapses postnatally (Dumas, 2005; Mierau et al., 2004; Yashiro and Philpot, 2009).  
63 In adult synapses, a fraction of GluN2B-containing NMDARs is maintained in a highly regional-  
64 specific manner; sensory and association cortices maintain a lower proportion of GluN2B  
65 containing NMDARs than hippocampal and prefrontal cortex areas (Mierau et al., 2004; Wang et  
66 al., 2008; Kohl et al., 2011).

67  
68 Previous research using human post-mortem tissue has shown that the ratio of *GRIN2B/GRIN2A*  
69 mRNA undergoes a reduction during early development similar to that found in many other  
70 species (Bar-Shira et al. 2015; Bagasrawala et al. 2016) and this is also evident at the protein  
71 level with an age-dependent reduction in GluN2B, and an increase in GluN2A, in the first years of

72 life (Jantzie et al., 2013). Importantly, GluN2B has been found to co-assemble with PSD-95 in  
73 resected brain tissue from patients <17 years old (Ying et al., 2004), suggesting that GluN2B  
74 might contribute to synaptic transmission in young adult cortical synapses. However, it is  
75 unknown whether there is further reduction of GluN2B in adulthood or old age and whether  
76 GluN2B-containing NMDAR contribute to synaptic transmission in the adult brain.

77  
78 Here, we tested directly whether GluN2B-containing NMDARs contribute to synaptic function in  
79 adult human cortical neurons. We used non-pathological tissue resected during neurosurgery  
80 from patients to test for NMDAR subunit composition in tissue homogenates and their  
81 association with the major synaptic scaffolding protein PSD-95. Furthermore we analysed  
82 synaptic transmission using patch clamp electrophysiology in brain slices of live temporal cortex.  
83 Our results show that NMDA/AMPA ratio decreases with age with a marked decline of GluN2B-  
84 NMDAR current in older synapses.

85

## 86 **Materials and Methods**

### 87 **Tissue Collection**

88 The use of human tissue complied with the Human Tissue Act (Southampton Research  
89 Biorepository study reference number: SRB002/14). Informed consent was obtained from all  
90 patients to use surgically-resected tissue not required for diagnostic purposes. Temporal cortex  
91 was chosen as its availability was sufficient to allow statistical analysis of data. Human brain slices  
92 were prepared as previously described by Verhoog et al. (2013). Briefly, resected tissue was  
93 obtained from temporal cortex of patients undergoing surgery for the removal of deeper  
94 structures. We obtained temporal cortical tissue from 17 individual neurosurgery cases (Table 1).  
95 In all cases, resected neocortical tissue was located well outside the epileptic focus or tumour and



96 displayed no structural abnormalities in preoperative magnetic resonance imaging investigations  
 97 (Fig 1A). The tissue collected was identified as macroscopically normal at the time of collection by  
 98 the operating team. The tissue was immediately placed in ice-cold artificial

| Case Number | Sex | Age | Diagnosis                                                   | Medication prescribed (time with medication)                                                                                                   | Other medical history                                                                                                                                | Brain area                                                      |
|-------------|-----|-----|-------------------------------------------------------------|------------------------------------------------------------------------------------------------------------------------------------------------|------------------------------------------------------------------------------------------------------------------------------------------------------|-----------------------------------------------------------------|
| 0001        | M   | 49  | Hippocampal sclerosis                                       | Carbamazepine (>1 year)                                                                                                                        | None known                                                                                                                                           | Right temporal lobe                                             |
| 0004        | M   | 52  | Hippocampal sclerosis                                       | Lamotrigine, Clobazam (>1 year)                                                                                                                | None known                                                                                                                                           | Right temporal lobe                                             |
| 0005        | F   | 60  | Hippocampal sclerosis                                       | Citalopram, Keppra, Omeprazole, Amitriptyline, Phenytoin, Morphine, Mebeverine (>1 year)                                                       | None known                                                                                                                                           | Right anterior temporal lobe                                    |
| 0007        | F   | 21  | DNET                                                        | Dexamethasone, Omeprazole, Lamotrigine, Eslicarbazepine (>1 year)                                                                              | None known                                                                                                                                           | Left anterior temporal lobe                                     |
| 0008        | M   | 71  | Glioblastoma                                                | Alfuzosin, Allupurinol, Dexamethasone, Phenytoin, Paracetamol, Lansoprazole (<3 months)                                                        | None known                                                                                                                                           | Right anterior temporal lobe                                    |
| 0010        | M   | 28  | Hippocampal sclerosis                                       | Lamotrigine, Clobazam, Carbamazepine (>1 year)                                                                                                 | None known                                                                                                                                           | Right posterior lateral temporal lobe (inferior temporal gyrus) |
| 0011        | F   | 42  | Glioma                                                      | N/A                                                                                                                                            | None known                                                                                                                                           | Left anterior temporal cortex                                   |
| 0014        | M   | 32  | Hippocampal sclerosis                                       | Citalopram, Lamotrigine, Levetiracetam, Pregabalin, Paracetamol, Salbutamol (>1 year)                                                          | Asthma, Depression                                                                                                                                   | Right anterior temporal lobe                                    |
| 0016        | F   | 36  | Hippocampal sclerosis                                       | Gabapentin, Senna, Omeprazole, Lamotrigine, Citalopram, Paracetamol (>1 year)                                                                  | None known                                                                                                                                           | Left anterior temporal lobe                                     |
| 0017        | F   | 62  | Hippocampal sclerosis                                       | Lamotrigine, Carbamazepine, Citalopram, Diazepam, Pregabalin, Prochlorperazine (>1 year)                                                       | Depression, Hypertension, Gastroreflux disease                                                                                                       | Right anterior temporal lobe                                    |
| 0018        | M   | 30  | Cavernous malformation                                      | Lamotrigine, Levetiracetam (>1 year)                                                                                                           | None known                                                                                                                                           | Right anterior temporal lobe                                    |
| 0020        | F   | 70  | Arteriovenous malformation                                  | Paracetamol, Amlodipine, Omeprazole, Estradiol, Fentanyl Patch, Avastatin, Qvar 100, Colecalciferol, Prednisolone, Nitrofurantoin (<1 month)   | Hysterectomy, Urostomy, Acute Myocardial Infarction, Hypertension, Polymyalgia Rheumatica, Hypercholesterolaemia, Recurrent Urinary Tract Infections | Right lateral temporal lobe (middle temporal gyrus)             |
| 0021        | M   | 49  | Hippocampal sclerosis                                       | Carbamazepine, Atenolol (>1 year)                                                                                                              | Glandular Fever                                                                                                                                      | Left posterior temporal lobe                                    |
| 0022        | F   | 58  | Intracerebral and subarachnoid haemorrhage                  | Paracetamol, Dihydrocodeine, Nimodipine (N/A)                                                                                                  | Multiple Aneurysms                                                                                                                                   | Right anterior temporal lobe                                    |
| 0024        | F   | 50  | Cavernous malformation                                      | Lamotrigine, Brufen, Paracetamol (>1 year)                                                                                                     | Gall stones, Hysterectomy                                                                                                                            | Right lateral temporal lobe (superior temporal gyrus)           |
| 0026        | M   | 27  | Mesial temporal DNET with signal changes in the hippocampus | Carbamazepine, Clobazam, Levetiracetam, Dexamethasone, Omeprazole, Dihydrocodeine, Paracetamol, Zonisamide, Morphine, Colecalciferol (>1 year) | None known                                                                                                                                           | Right anterior temporal lobe                                    |
| 0028        | F   | 38  | Epilepsy                                                    | Zolpicon Zafirlukast, Senna, Citalopram, Cinnarizine, Amitriptyline, Zonisamide, Loestrin (>1 year)                                            | Asthma                                                                                                                                               | Right anterior temporal lobe                                    |

99

100 **Table 1. Human tissue case data.** F, female; M, male. Pathological tissue from patients 0011  
101 and 0021 were used as positive control in Fig 1D. Cases that met exclusion criteria: cases 8  
102 and 20 (Iba1 quantification), and case 11 (GluN2B cleavage). DNET, Dysembryoplastic  
103 neuroepithelial tumour.

104

105

106 cerebrospinal fluid (ACSF) solution while still in theatre. ACSF contained the following (in  
107 mM): 110 choline chloride; 26 NaHCO<sub>3</sub>; 10 D-glucose; 11.6 sodium ascorbate; 7 MgCl<sub>2</sub>; 3.1  
108 Sodium pyruvate; 2.5 KCl; 1.25 NaH<sub>2</sub>PO<sub>4</sub>·2H<sub>2</sub>O; 0.5 CaCl<sub>2</sub>. Tissue was then taken to the  
109 laboratory and fresh frozen for biochemistry, fixed for immunohistochemistry or processed  
110 for slice electrophysiology. Transfer time between operating theatre and laboratory was  
111 approximately of 10-15 minutes.

112

113 Animal care and experimental procedures were conducted in accordance with UK Home Office  
114 regulations under the Animals (Scientific Procedures) Act of 1986. Mice were decapitated  
115 following isoflurane anaesthesia. Brains were extracted in ice-cold ACSF and sliced or snap-frozen.  
116 All brain tissue samples were stored in the -80°C freezer until lysed.

117

#### 118 Acute Brain Slice Preparation

119 Brain slices (350 µm thick) were prepared in ice-cold choline ACSF solution (Verhoog et al., 2013)  
120 using a Campden Instruments vibrating microtome and kept for 30 min at 35-37°C, then at room  
121 temperature in recording ACSF containing the following (in mM): 126 NaCl; 2 CaCl<sub>2</sub>; 10 glucose; 2  
122 MgSO<sub>4</sub>·7H<sub>2</sub>O; 3 KCl; 1.25 NaH<sub>2</sub>PO<sub>4</sub>·2H<sub>2</sub>O; 26.4 NaHCO<sub>3</sub>; pH 7.2-7.4. The ACSF was bubbled with  
123 carbogen gas (95% O<sub>2</sub>/5% CO<sub>2</sub>) and had an osmolarity of ~300 mOsm.

124  
125 Electrophysiological Recordings  
126 Following previously published methods (Verhoog et al. 2013), slices were transferred to a  
127 submerged-style recording chamber and superfused with recording ACSF at a rate of ~1.5ml/min.  
128 Whole-cell voltage clamp recordings were performed using glass pipettes (4-6 M $\Omega$ ) pulled from  
129 borosilicate glass, yielding a series resistance of 10-20 M $\Omega$ . Recordings were made at room  
130 temperature (21-25°C) using Cs-gluconate-based intracellular solution, containing (in mM): 70  
131 Gluconic acid; 10 CsCl; 5 NaCl; 10 BAPTA free acid; 10 Hepes; 10 QX-314; 0.3 GTP; 4 Mg-ATP; pH  
132 was titrated to 7.25 with CsOH. The estimated final Cs concentration for the intracellular solution  
133 was 120 mM. The final osmolarity was  $280 \pm 5$  mOsmol $^{-1}$ . All voltage values were corrected for  
134 the liquid junction potential of -15 mV which was measured directly. Biocytin (2mg/ml) was added  
135 for labelling (Fig 1C) and following recordings, the slice was fixed in 4% paraformaldehyde for 24  
136 hours and stored in PB. Slices were washed in 0.1M PB, dehydrated using increasing ethanol  
137 percentages (70%, 80%, 95% and 2x100%, for 5 minutes each) and then processed using an avidin-  
138 biotin-peroxidase kit (Vector laboratories).

139  
140 Excitatory postsynaptic currents (EPSCs) were evoked using a stimulus isolator unit (ISO-Flex,  
141 A.M.P.I.) connected to a monopolar extracellular stainless-steel electrode, which was placed near  
142 an apical dendrite and within 100-150  $\mu$ m from a LII-III pyramidal neuron soma. Stimulation  
143 strength was adjusted to yield a ~200 pA EPSC amplitude at a holding potential of -70 mV to  
144 minimise space-clamp error. Synaptic stimulation was evoked at 0.07 Hz with 100  $\mu$ s stimulus  
145 length. Series resistance was not compensated during recordings but was monitored before each  
146 stimulation with a 5 mV 50 ms step pulse. Recordings were terminated if series resistance changed  
147 by more than 20%. Data were low-pass filtered at 2 kHz and acquired at 20 kHz with an Axon

148 Multiclamp 700B amplifier (Molecular Devices, Sunnyvale, U.S.A.) using MATLAB (Mathworks,  
149 Natick, U.S.A.) and custom software (MatDAQ, Hugh P.C. Robinson, University of Cambridge 1995-  
150 2013). EPSCs were recorded 10 minutes after initiating a whole-cell patch to allow the dialysis of  
151 the Cs-based internal solution. EPSCs were recorded in the presence of gabazine (also known as  
152 SR-95531, Tocris Bioscience) at a concentration of 3  $\mu$ M to measure NMDAR currents in the  
153 absence of GABA<sub>A</sub>-mediated currents (Vargas-Caballero et al. 2011). To measure the contribution  
154 of AMPAR and NMDAR-mediated currents to individual EPSCs, the holding membrane potential  
155 was clamped at  $-70$ mV and  $+40$ mV, respectively, in alternating sweeps. Cells were maintained at  
156  $-70$  mV in between stimuli and the membrane potential was changed to holding potential 2 sec  
157 prior to synaptic stimulation. Evoked EPSCs were analysed using custom-written MATLAB scripts.  
158 A minimum of 5 continuously recorded sweeps for each AMPAR and NMDAR were measured.  
159 AMPAR current was measured at its peak and NMDAR current was measured as the average  
160 current at 55-57ms following stimulation, at which time the AMPAR showed decay to  $\sim 5\%$  of its  
161 peak amplitude. The NMDAR/AMPA ratio was calculated by dividing the amplitude of NMDAR  
162 current measured by the peak AMPAR current. Successful patch clamp recordings in whole-cell  
163 configuration could be made up until 12 hours after resection using this tissue.

164  
165 Averaged evoked NMDAR currents (from peak back to baseline) were fitted with least squares  
166 (Matlab) using a double exponential equation as follows:

$$167 \quad I_t = I_{fast} * e^{-\tau_{fast}} + I_{slow} * e^{-\tau_{slow}}$$

168 where  $I_{fast}$  and  $I_{slow}$  were the amplitudes of the fast and slow decay components, and  $\tau_{fast}$  and  $\tau_{slow}$   
169 are the decay time constants. Following Stocca and Vicini (1998) we used a weighted mean decay  
170 time constant to compare a single experimental value across conditions:

$$171 \quad \tau_w = [I_{fast}/(I_{fast} + I_{slow})] * \tau_{fast} + [I_{slow}/(I_{fast} + I_{slow})] * \tau_{slow}$$

172 A single  $\tau_w$  value was obtained per patient by averaging  $\tau_w$  from different cells.

173

174 Co-immunoprecipitation

175 Fresh frozen human tissue blocks immediately adjacent to sliced/fixed tissue, were stored at -80°C

176 after resection was homogenized on ice using a Pellet Pestle in SDS-free RIPA buffer (2x Phosphate

177 Buffered saline (PBS); 1% sodium deoxycholate; 1% NP40, 5mM EDTA; Halt protease and

178 phosphatase inhibitor cocktail (ThermoFisher Scientific). Homogenates were centrifuged at

179 14,000 rpm for 10 min 4°C and supernatants were collected for BCA assaying (ThermoFisher

180 Scientific) to determine protein concentrations. One lysate sample for each human case was set

181 aside for Western blotting as input lane. For immunoprecipitation, a total of 1mg of protein was

182 diluted in 1ml of RIPA buffer. A pre-clear step was performed by adding protein A-agarose beads

183 (Merck Millipore) to the lysates, while rotating for 30min at 4°C. Following centrifugation at 10,000

184 rpm for 2 min, the supernatants were collected and samples were incubated overnight at 4°C with

185 PSD-95 antibody raised in rabbit (CST #2707; 1:50 dilution), or rabbit IgG as control. Samples were

186 precipitated by incubating with protein A-agarose beads for 1 hr at 4°C. Precipitated proteins were

187 released from the beads by heating at 95°C for 5 min in 4X loading sample buffer prior to SDS-

188 PAGE along with 18.75  $\mu$ g of input.

189

190 SDS-PAGE and Western Blotting

191 Equal amounts of protein (28 $\mu$ g) were separated in 7.5% acrylamide gels by SDS-PAGE and

192 transferred onto nitrocellulose membranes. Membranes were blocked in 5% (w/v) non-fat milk

193 for 1hr at room temperature and incubated overnight at 4°C in 5% (w/v) bovine serum albumin

194 (BSA) containing 0.1% (v/v) Tween-20 and one of the following primary antibodies: anti-NMDAR2A

195 (ab133265; 1:1000; Abcam); anti-NMDAR2B (610416; 1:1000; BD Neurosciences), anti-PSD-95

196 (D27E11; 1:1000; CST), and GAPDH (D16H11; 1:1000; CST). Membranes were washed 3 times with  
197 Tris-buffered saline (TBS) containing 0.1% Tween-20 (TBS-T) and probed with fluorophore-  
198 conjugated goat anti-mouse/-rabbit secondary antibody (1:10000; LI-COR). Proteins were  
199 visualised using the Odyssey infrared scanner (LI-COR) and bands were quantified as a proportion  
200 of housekeeping protein GAPDH using Image Studio Light Software.

201

## 202 Immunohistochemistry

203 Tissue was immediately fixed in 4% paraformaldehyde for 24 hrs and cut into 35 µm free-floating  
204 sections for immunohistochemistry. All washes were performed with PBS containing 0.1% Tween-  
205 20 (PBS-T 0.1%), unless stated otherwise. Sections were incubated in 0.3% H<sub>2</sub>O<sub>2</sub>, 10% methanol  
206 in PBS-T 0.1% for 30mins and then in blocking solution containing 5% goat serum (Sigma Aldrich),  
207 5% BSA (Fisher Scientific, BP1600) in PBS-T 0.2% for 1hr. Sections were then incubated overnight  
208 at 4°C in blocking solution containing one of the following primary antibodies: anti-GFAP (1:2000;  
209 Merck Millipore) and anti-Iba1 (1:500; Wako). Sections were then washed (3 x 5min) and  
210 incubated with the appropriate biotinylated secondary antibody (1:200, Biotinylated Goat Anti-  
211 Mouse Antibody (BA-9200), 1:200, Biotinylated Goat Anti-Rabbit Antibody (BA-1000), Vector  
212 Labs). Sections were then incubated in the avidin-biotinylated horseradish peroxidase complex  
213 (ABC) for 30 minutes. Following the ABC incubation sections were mounted onto gelatinised slides  
214 and were developed using 3,3'-diaminobenzidine (DAB) precipitation. Sections were washed (3 x  
215 5min) in 0.1M PB, dehydrated using increasing ethanol percentages (70%, 80%, 95% and 2x100%,  
216 for 5 minutes each). Sections were incubated in xylene (2x10minutes each) and mounted using  
217 Entellan® New, mounting medium. Images from stained sections were taken using a Leica  
218 Microscope (Leica DM5000B) with Q software for image capture.

219 Sections were visualised using 3,3'-diaminobenzidine (DAB) precipitation under a light microscope  
220 (Leica DM5000B) with Q software for image capture. GFAP- and Iba1-positive cells were counted  
221 in 12 layer II-III sampling fields per case (chosen at random from 2-3 different slices) of temporal  
222 cortical tissue from putative non-pathological and pathological (sclerotic hippocampus or glioma)  
223 samples with available tissue using ImageJ (NIH) software.  
224

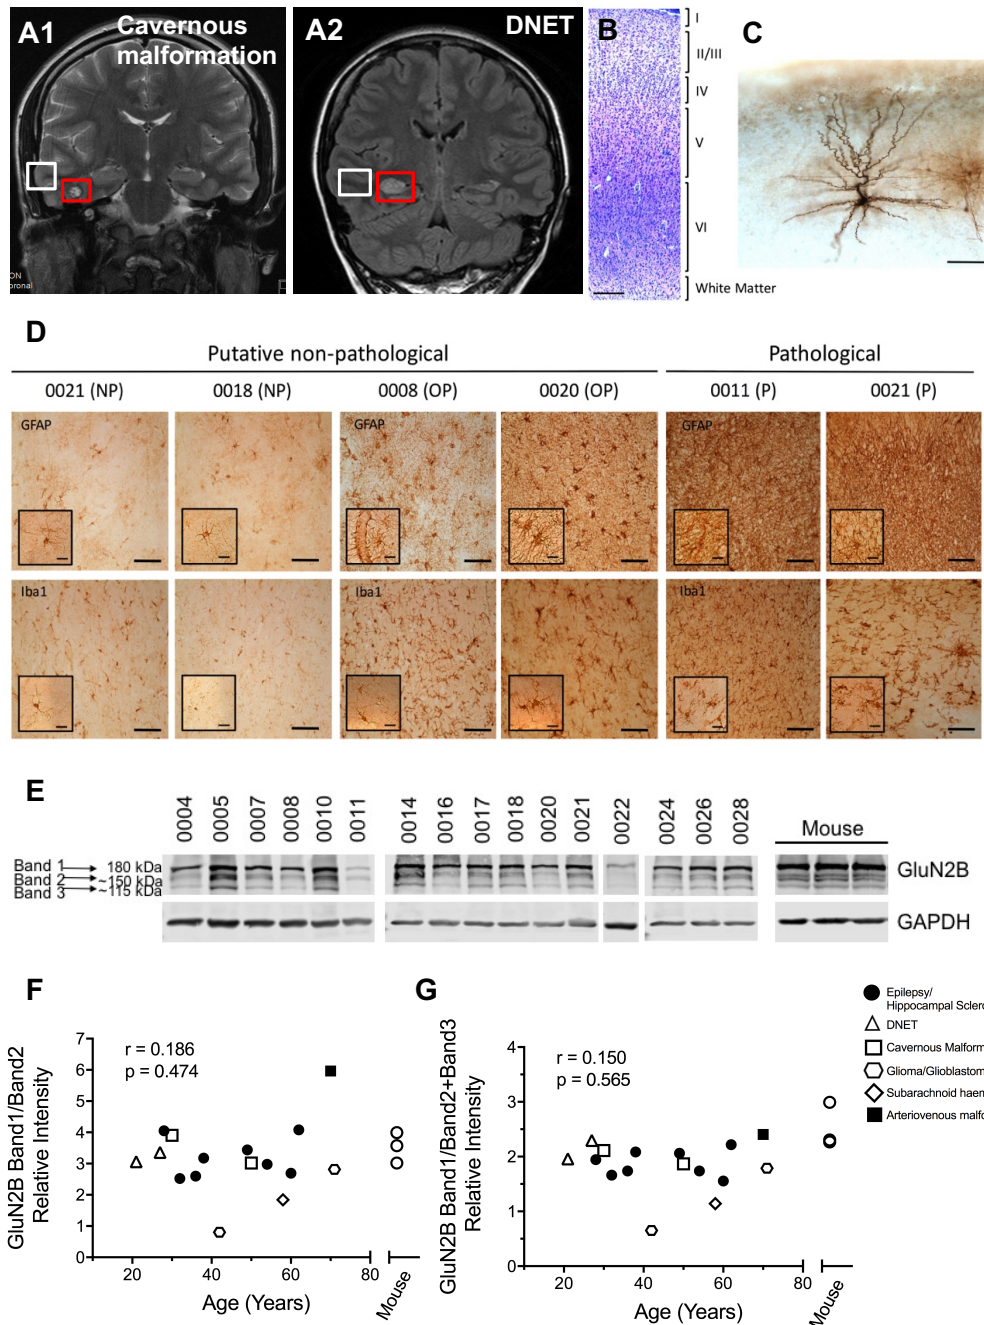

225

226 Figure 1. Characterisation of human brain tissue resected from neurosurgical cases. (A) MRI  
227 images from two patients. Coronal T2 image of a cavernous malformation (A1) and coronal FLAIR  
228 image of a DNET (A2) taken prior to surgery. Red box: area of pathology necessitating  
229 neurosurgical removal, white box: resected tissue used for analysis. (B) Nissl stain in fixed tissue  
230 showing the preservation of cortical layer architecture. (C) Visualisation of a LII-III pyramidal  
231 neuron that was recorded in patch clamp mode and dialyzed with biocytin, fixed, and DAB



232 stained. (D) Immunohistochemical analysis of putative non-pathological resected tissue  
233 compared with pathological tissue resected from the region of underlying pathology.  
234 Representative images of immunostaining for inflammatory markers, GFAP and Iba1, of putative  
235 non-pathological (PNP) resected temporal cortex showing no pathology (NP), of putative non-  
236 pathological resected temporal cortex where we observed pathology (OP), and of known  
237 pathological tissue, resected from the regions of underlying pathology (P). (E) GluN2B  
238 immunoblot using resected human samples; lysates made from fresh-frozen human temporal  
239 cortices tissue and from fresh-frozen mouse temporal cortices (n=3). (F) Band1/Band2 and (G)  
240 Band1/(Band2+Band3) ratio plotted against age. No correlation observed between the ratios and  
241 subject age (Spearman's coefficient of correlation (r) and p-value (p) are indicated). Scale bars in  
242 (B) = 200  $\mu\text{m}$ , in (C) = 100  $\mu\text{m}$ , in (D) = 100  $\mu\text{m}$  (Inset = 20  $\mu\text{m}$ ) . Symbols in F and G correspond to  
243 the neurological condition necessitating neurosurgery.

244

245

## 246 **Results**

247 We used non-pathological cortical tissue samples resected during neurosurgical procedures to  
248 obtain access to deep brain lesions (Fig. 1A, Table 1). The tissue was collected in theatre and  
249 rapidly processed using the brain slice technique (Verhoog et al. 2013). The well-preserved cortical  
250 architecture of these slices (Fig. 1B) allowed for electrophysiological recordings in putative LII-III  
251 pyramidal neurons that were identified by their location within cortical layers and their  
252 morphology (Fig. 1C). First, we characterised the quality and health of collected tissues using fixed  
253 or snap-frozen samples of brain tissue that were immediately adjacent to that used for  
254 electrophysiology. Reactive astrocytes and activated microglia are reliable inflammatory indicators  
255 of disease in mammalian brain tissue (Perry et al. 2010) (Figure 1D). As positive controls for

256 inflammatory pathology, we stained pathological sections (epileptic foci N = 2 patients, tumour  
257 tissue N = 1 or cavernous malformation tissue N = 1) with GFAP to label astrocytes and Iba1 to  
258 label microglia. We compared putative non-pathological tissue (Supplementary Fig. 1A-E) against  
259 pathological tissue (cases 11 and 21). Qualitatively, the putative non-pathological tissue showed  
260 normal GFAP-positive cell morphology in contrast with highly ramified and fibrotic astrocytes  
261 observed in pathological tissue. Furthermore, the GFAP density was significantly lower in putative  
262 non-pathological tissue than in pathological tissue. In our Iba1 analyses, we found two cases with  
263 activated microglia density similar to that of positive controls (Fig. 1D and Suppl. Fig. 1C). We  
264 therefore labelled these two cases as observed pathology (OP) and excluded them from synaptic  
265 analyses. The density of microglia in the human brain does not change with age, as recently  
266 reported by us (Askew et al., 2017). Here, we observed densities in accordance with previously  
267 published data, and similarly did not observe significant age-dependent changes in astrocyte  
268 density ( $r = -0.03$   $p = 0.92$ ) or microglia density ( $r = -0.54$   $p = 0.09$ ).

269  
270 Next, we sought to further control for resected tissue quality by measuring the ratio of full length  
271 to cleaved GluN2B protein, which has previously been demonstrated as a robust control for  
272 synaptic proteome integrity in post-mortem human brain tissue (Bayés et al., 2014). Using  
273 Western blot analysis of GluN2B in fresh frozen samples with an antibody that recognises full-  
274 length protein (Band 1, 180kDa) and cleaved products (Bands 2 and 3, 150 and 115kDa), we  
275 measured the ratio of full-length to cleaved GluN2B (Figure 1E-G). All except one of our samples  
276 met the criteria of Band 1/Band 2 ratio  $>1$  (Bayés et al., 2014) demonstrating lack of proteome  
277 degradation. Given the observed degradation of full-length GluN2B, the sample showing a ratio of  
278  $<1$  (case 0011), was excluded from synaptic analyses. All fresh-frozen tissue samples showed the  
279 presence of GluN2B cleavage products, likely indicating functional and turnover-related regulation

280 of the channel by proteases such as calpain (Wu et al., 2005). The full-length-to-cleaved band ratio  
281 was not altered with age (Figure 1F-G). We observed a similar GluN2B protein profile in rapidly  
282 processed adult mouse brain tissue (Fig 1E-G), which confirmed that basal cleavage of GluN2B in  
283 fresh frozen tissue was not an artefact of tissue collection. This shows that high quality tissue can  
284 be obtained from human patients irrespective of age.

285  
286 To test whether total protein levels decrease with age, we performed further Western blot  
287 quantifications of GluN2A and GluN2B subunits. We found that both GluN2A and GluN2B protein  
288 levels decreased with age, and a trend ( $p = 0.08$ ) was observed for GluN2A-S (Fig 2A-D). Using PSD-  
289 95 pull-down from brain homogenates we were able to observe both GluN2A and GluN2B in  
290 samples from 27, 49 and 50 year old patients, however in a sample from a 58 year old we were  
291 not able to see GluN2B co-immunoprecipitated with PSD-95 (Fig 2E). Not all samples yielded  
292 successful precipitated PSD-95 lanes and thus we did not quantify co-precipitation. To analyse  
293 whether the observed decrease in GluN2A and GluN2B NMDAR subunits was associated with  
294 overall reduction in synaptic proteins we also tested available samples for synapsin (pre-synaptic),  
295 PSD-95 (post-synaptic) and the AMPAR subunit GluA1 (Fig 3A). We observed that there was no  
296 correlation with age in the amount of these proteins in cortical homogenate normalised against  
297 total protein load (Fig 3B-G)

298

299

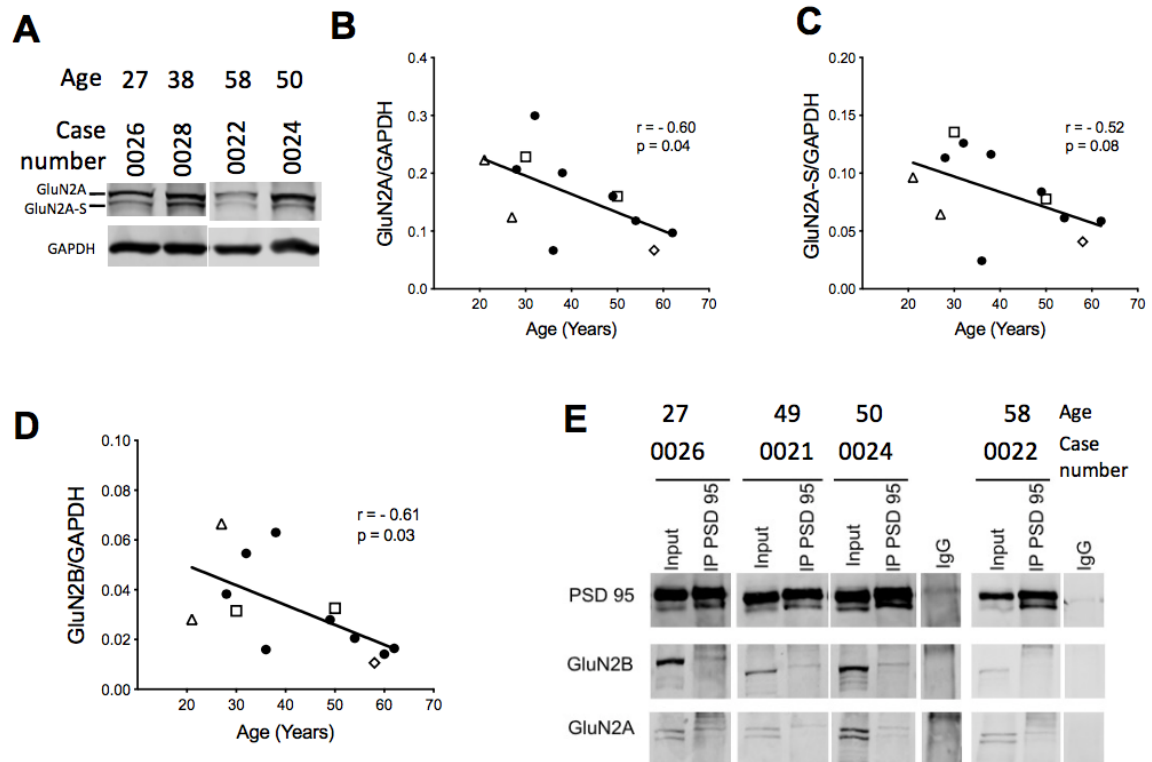

300

301

302 Figure 2. GluN2A and GluN2B protein levels in adult human temporal cortical tissue

303 homogenate show an age-dependent decline. (A) Representative examples of GluN2A blot

304 showing GluN2A and GluN2A-S bands. Quantification for GluN2A (B) and GluN2A-S (C), and

305 GluN2B (B, from blots shown in Fig. 1E) relative to the constitutive protein GAPDH. Spearman's

306 coefficient of correlation ( $r$ ) and  $p$ -value ( $p$ ) are indicated for each measure. (E) Representative

307 blots of GluN2A and GluN2B subunits co-immunoprecipitated with PSD-95 using human

308 temporal cortical tissue lysates. Symbols in B, C and D correspond to the neurological condition

309 necessitating neurosurgery as depicted in Figure 1.

310

311

312

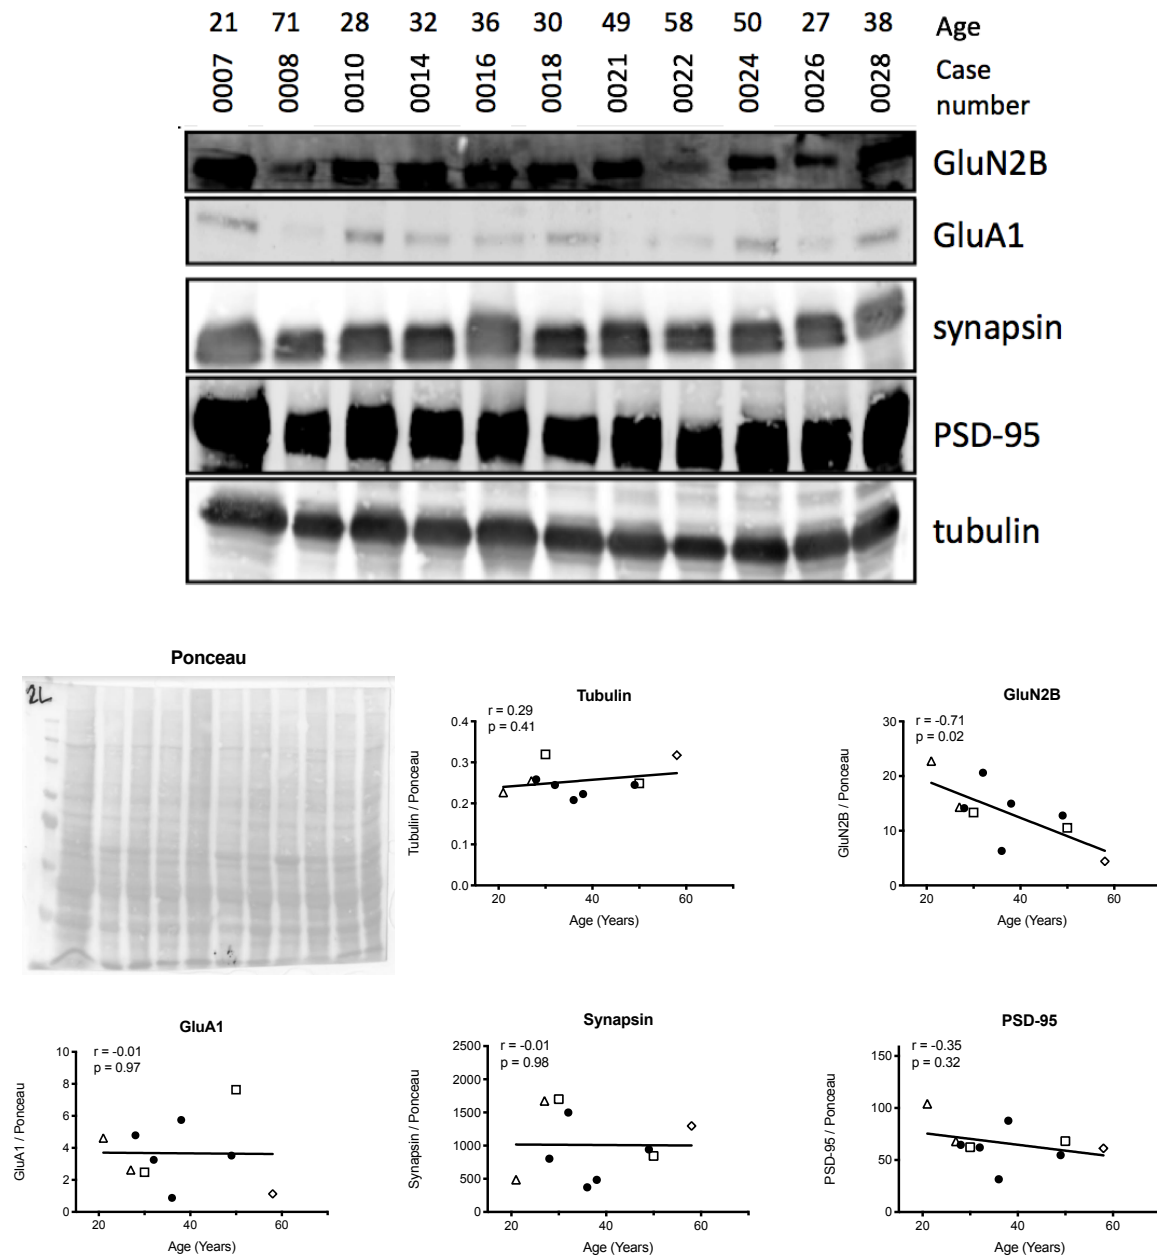

313

314 **Figure 3.** GluN2B protein levels in adult human temporal cortical tissue homogenate normalised

315 against total protein load and comparison with other synaptic proteins. (A) Western blot for

316 GluN2B, synaptic proteins and tubulin as loading control. (B) Ponceau-stained membrane to

317 reveal total protein load. Quantification of Tubulin (C), GluN2B (D), GluA1 (E), synapsin (F) and

318 PSD-95 (G) plotted against age. Spearman's coefficient of correlation ( $r$ ) and  $p$ -value ( $p$ ) are

319 indicated for each measure. Symbols in C-G correspond to the neurological condition

320 necessitating neurosurgery as depicted in Figure 1. Case 0008 in (A) was pathological and was

321 not quantified.

322 We next analysed patch clamp recordings to determine whether these receptors participate in  
323 basal synaptic transmission. NMDA and AMPA currents exhibited current voltage relationships  
324 similar to those observed in rodents (Figure 4A-B). We analysed the age-dependence of  
325 NMDA/AMPA receptor ratio by measuring AMPAR component at -70 mV and NMDAR component  
326 at sustained +50 mV depolarisation to relieve the  $Mg^{2+}$  block (Mierau et al., 2004; Vargas-Caballero  
327 and Robinson, 2004), in subsets of cells with and without pre-incubation with the selective GluN2B  
328 inhibitor, Ro 25-6981 (500 nM), which shows similar pharmacological properties in both rat and  
329 human recombinant receptors (Hedegaard et al., 2013). The NMDA/AMPA ratio showed a  
330 significant decrease with age (Figure 4C), suggesting an age-dependent reduced contribution of  
331 NMDARs to synaptic transmission. In contrast, the NMDA/AMPA ratio remained constant across  
332 ages in recordings from slices pre-incubated with Ro 25-6981 (Figure 4D), which at 500 nM inhibits  
333 recombinant NMDAR di-heteromers (GluN1/GluN2B). This suggests that GluN2B loss could be a  
334 key determinant of reduced synaptic NMDAR input to ageing temporal cortical synapses.

335 In a subset of experiments, NMDAR currents were measured before and after application of Ro  
336 25-6981 in the same cell. These experiments required holding neurons in whole-cell configuration  
337 for >30 minutes to allow time for initial dialysis of intracellular voltage-clamp solution, acquisition  
338 of control data, wash in of bath-applied Ro and, importantly, to allow time for full NMDAR current  
339 inhibition by the use-dependent antagonist Ro 25-6981 (Fischer et al, 1997). We observed that  
340 NMDA/AMPA ratios from subjects younger than 45 showed sensitivity to Ro treatment while those  
341 for older than 45 subjects did not (<45 years old NMDA/AMPA ratio before =  $0.88 \pm 0.20$ , after Ro  
342 25-6981 treatment =  $0.46 \pm 0.05$  N = 3, and >45 years old NMDA/AMPA ratio before =  $0.53 \pm 0.15$   
343 after Ro 25-6981 treatment  $0.474 \pm 0.08$ ,  $p < 0.05$ , N = 5). These data also show that the fraction  
344 of NMDAR current inhibited by Ro was larger in synapses from younger individuals ( $42\% \pm 0.15$

345 versus  $1\% \pm 0.16$  in older individuals,  $p < 0.05$ ). These findings are consistent with our results above  
346 using Ro preincubation.

347

348 Given that recombinant NMDARs containing either GluN1/GluN2A and GluN1/GluN2B have  
349 distinct postsynaptic current decay kinetics (Stocca and Vicini, 1998), we fitted a double  
350 exponential decay function to all recorded currents and obtained a weighted time constant value  
351 ( $\tau_w$ , see methods) for each case. We found that  $\tau_w$  decreased significantly with age, this is  
352 consistent with synapses from younger individuals having a higher proportion of synaptic GluN2B  
353 containing receptors that is progressively reduced with age (Fig 4E). Interestingly, we found that  
354 in the presence of Ro 25-6981 500 nM there was still significant decrease of  $\tau_w$  with age albeit at  
355 lower significance value ( $p < 0.05$ ) and with a smaller correlation coefficient than in the absence of  
356 Ro 25-6981 ( $r = -0.57$ ). It is possible that tri-heteromers, that have  $\tau_w$  larger than GluN1/GluN2A  
357 but lower than GluN1/GluN2B di-heteromers are the cause of this enhanced  $\tau_w$  in younger  
358 individuals. In this instance, Ro 25-6981 (an ifenprodil derivative) would only achieve partial  
359 inhibition of tri-heteromers even at saturating antagonist concentrations (Stroebel et al. 2018).  
360 However, we cannot rule out whether other slower-decaying NMDAR variants (GluN2C or GluN2D  
361 or those containing GluN1 with exon5 spliced) are present at a younger age in human cortical  
362 synapses.

363

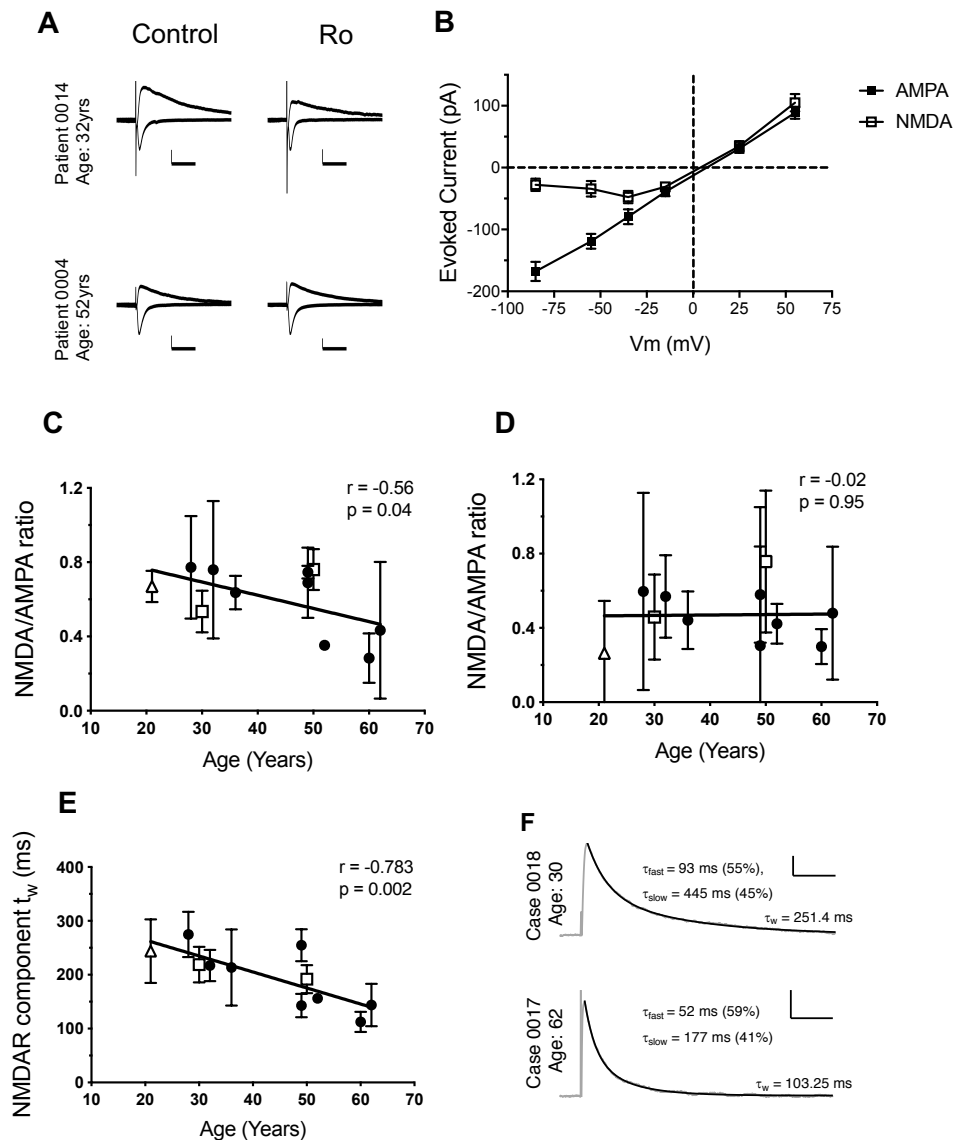

364

365 Figure 4. NMDA/AMPA responses from human cortical synapses with or without specific  
 366 GluN2B inhibitor and their age dependence. (A) Representative NMDA- and AMPA-mediated  
 367 currents from adult human brain slices in LII-III temporal cortex voltage clamped at -70 and  
 368 +50mV with and without 500 nM Ro 25-6981 treatment. NMDAR-mediated currents from a 32-  
 369 year-old are slow-decaying and with Ro treatment they producing a smaller and faster decaying  
 370 outward current. NMDAR-mediated currents from a 52-year-old show no sensitivity to Ro 25-  
 371 6981 treatment. (B) Average I/V relations for NMDA and AMPA responses (n=7 patients). I/V



372 relations for NMDA-mediated responses show a voltage dependence (characteristic ‘J-shaped’  
373 curve), showing the block of the receptor at hyperpolarized membrane potentials. I/V relations  
374 for AMPA-mediated responses are linear. (C) NMDA/AMPA ratios are negatively correlated with  
375 age under control conditions. (D) No correlation was observed between NMDA/AMPA ratios and  
376 age for recordings carried in 500 nM Ro 25-6981. (E) The weighted NMDAR time constant  $\tau_w$   
377 shows an age dependent decline, suggesting a reduced contribution of the slow decaying  
378 GluN1/GluN2B containing NMDARs. Each data point represents the average measure  $\pm$  SEM per  
379 patient. (F) Sample lines of best fit. Scale bars in (A) = 50 ms, 50 pA and (F) = 200 ms, 50 pA.  
380 Scatter dot plots with error bars in graphs represent mean  $\pm$  SEM per patient. Spearman’s  
381 coefficient of correlation (r) and p-value (p) are indicated for each measure. Symbols in C, D and  
382 E correspond to the neurological condition necessitating neurosurgery as depicted in Figure 1.  
383

384 Discussion.

385 A sharp developmental increase in GluN2A and a decrease in GluN2B-containing NMDARs has  
386 been observed in many model systems including rodents (Dumas, 2005; Yashiro and Philpot, 2009  
387 and reviewed in Paoletti et al., 2013). In humans, an 8% reduction in *GRIN2B* mRNA expression  
388 during mid-gestation was accompanied by a 21% increase in *GRIN2A* mRNA expression  
389 (Bagasrawala et al., 2016), these observations are consistent with larger scale mRNA analyses  
390 across the human lifespan showing that, while minor changes occur with *GRIN2B* during  
391 embryonic development and adult life, a major increase in *GRIN2A* expression is observed during  
392 gestation (Bar-Shira et al., 2015).

393 Although GluN2A containing channels are broadly considered the major carriers of NMDAR-  
394 mediated synaptic current in the adult forebrain (Hildebrand et al., 2014), adult GluN2B-  
395 containing NMDARs are required in adult brain circuits to regulate synaptic strength and memory  
396 in mice. In hippocampal CA3-CA1 synapses the levels of GluN2B expression in CA3-CA1 synapses  
397 are correlated with the ability of synapses to undergo long term potentiation (Kohl et al., 2011).  
398 The high affinity association between GluN2B subunits with CaMKII $\alpha$  (Barria and Malinow 2005)  
399 is hypothesised to promote localisation of this molecular Ca<sup>2+</sup> dependent switch to synaptic  
400 regions and influence nearby downstream effectors of synaptic maintenance and plasticity. The  
401 long decay kinetics exhibited by GluN2B containing NMDAR can effectively integrate trains of  
402 stimuli by providing a long window for coincidence detection of synaptic release and post-synaptic  
403 depolarisation (Vargas-Caballero and Robinson, 2004) a function which may contribute to working  
404 memory in the prefrontal cortex where a substantial fraction of GluN2B-containing NMDARs  
405 remains in adulthood (Wang et al., 2008).

406

407 NMDARs are essential for numerous spatial memory tasks as well as for many forms of long-term  
408 synaptic plasticity, a molecular correlate of learning and memory (Bliss and Collingridge 1993;  
409 Takeuchi et al. 2013). Overexpression of the GluN2B subunit in mice led to increased recruitment  
410 of synaptic GluN2B, improved performance in memory tests and enhanced synaptic plasticity  
411 (Tang et al. 1999, Cui et al. 2011).

412  
413 In adult and ageing rodents, the contribution of GluN2B to synaptic function is reduced compared  
414 to younger animals and the decline in GluN2B subunit expression is correlated with impaired  
415 memory functions (Clayton et al. 2002; Magnusson, 2012; Magnusson et al. 2010; Zhao et al.,  
416 2009). However, it was not known whether age dependent changes in GluN2B synaptic  
417 composition also occurred over the adult human lifespan. To analyse the age dependence of  
418 NMDAR composition in human synapses we studied samples from adult patients within a broad  
419 age span. Using GFAP and Iba1 as inflammation markers and GluN2B as a protein degradation  
420 marker, we were able to assess the quality of this tissue as non-pathological. We observed that  
421 although protein expression for both glutamate receptor subunits GluN2A and GluN2B is reduced  
422 with age, both proteins are still produced at detectable levels in older adults (Fig 2). By using a  
423 pharmacological approach, whereby Ro 25-6981 500 nM selectively inhibits receptors containing  
424 GluN1/GluN2B subunits, our data demonstrate that a significant fraction of these NMDAR  
425 channels participate in basal synaptic function in cortical slices in younger adults but less so in  
426 older adults. This result is in sharp contrast with predictions from equivalent mouse studies, and  
427 our own analyses where Ro 25-6981 had no significant effect of the NMDA/AMPA ratio in young  
428 adult mice (3-5 months) (Supplementary Figure 2 1A-C). Thus, our data using pharmacological  
429 blockade of synaptic currents with Ro 25-6981, and changes in  $\tau_w$  in synaptic NMDAR currents  
430 shows that synaptic GluN2B contribution is reduced in human cortical synapses with ageing.

431 Mechanisms of synaptic anchoring via post-translational modifications (Lussier et al., 2015) and/or  
432 association with other synaptic density proteins (Chen et al., 2015) may underlie this age-  
433 dependent GluN2A or GluN2B content in human cortical synapses. Further analyses of human  
434 tissue derived from neurosurgery allowing for the analysis of well-preserved protein-protein  
435 interactions and post-translational modifications will allow a deeper understanding of the factors  
436 that cause GluN2B loss from older human synapses. Our measures do not distinguish between di-  
437 heteromeric receptors (GluN2B/GluN1) or tri-heteromeric receptors (GluN2B/GluN2A/GluN1),  
438 both of which show a widespread expression adult rodent brain (Rauner and Köhr, 2011) and  
439 further biochemical and/or pharmacological analysis will be required to address their contribution  
440 to human cortical synaptic transmission. Our measures focused on synaptic inputs to excitatory  
441 neurons, however, in rodents inhibitory interneurons also possess specific subsets of synaptic  
442 glutamatergic receptors including those containing GluN2B (reviewed in Akgül et al 2016) which  
443 are regulated in a regional and developmental manner. Further analysis will be required to test  
444 the synaptic composition in identified subtypes of human inhibitory interneurons.

445  
446 Mounting evidence in model systems shows that a reduction in synapse number and turnover, as  
447 well as alterations of synaptic receptor composition, are correlated with age-related cognitive  
448 decline in rodents and primates (Morrison and Baxter, 2012; Mostany et al., 2013). Previous work  
449 suggests a causal role of GluN2B recruitment at the synapse in regulating synaptic strength and  
450 memory storage. Furthermore, overexpression of the GluN2B subunit in mice led to increased  
451 recruitment of synaptic GluN2B resulting in improved memory and enhanced synaptic plasticity  
452 (Cui et al., 2011; Tang et al., 1999). Since synaptic NMDAR content and composition can determine  
453 integrative and plastic properties in neurons (Yashiro and Philpot, 2009), our observations  
454 highlight a biologically plausible mechanism for the reduction in cortical plasticity observed across

455 the human age span (Freitas et al. 2011) and the cognitive ageing in the human brain which can  
456 be observed from middle age (Singh-Manoux et al., 2012).

457

458 Experiments using live human tissue derived from neurosurgery can further our understanding of  
459 molecular mechanisms behind synaptic ageing synapse alterations in disease. This can be studied  
460 either directly in diseased tissue from patients (Finardi et al., 2006; Ying et al., 2004) or by acutely  
461 mimicking disease states using non-pathological tissue processed with the brain slice technique  
462 (Vargas-Caballero et al., 2016).

463

464 Understanding synaptic composition throughout the human age span can also inform drug  
465 development for neurological conditions affecting young or older individuals, as well as aid in  
466 understanding and ameliorating off-target effects of widely used drugs. As an example, fluoxetine  
467 (Prozac), also inhibits GluN2B-containing receptors (Kiss et al., 2012) and thus, may have  
468 differential side-effects in young and older brains. Furthermore, data on human synapse  
469 composition and function, such as our work presented here, can serve as a benchmark to further  
470 develop pluripotent stem cell models (Zhang et al., 2016) to mimic the GluN2A/ GluN2B synaptic  
471 composition for the disease model of interest.

472

#### 473 **Funding.**

474 This work was supported by the Institute for Life Sciences, University of Southampton (Senior  
475 Research Fellowship to MVC) and Wessex Medical Trust (Innovation Grant to MVC). CMP was  
476 funded by the Gerald Kerkut Trust and the Institute for Life Sciences (PhD studentship).

477

#### 478 **Acknowledgements.**

479 We thank Prof. Delphine Boche for helpful discussions on human brain tissue

480 immunohistochemistry.

481

482

483

484 **References**

485 Akgül G, McBain CJ. 2016. Diverse roles for ionotropic glutamate receptors on inhibitory  
486 interneurons in developing and adult brain. *J Physiol.* 594:5471–5490.

487

488 Askew K, Gomez-Nicola D. 2018. A story of birth and death: Insights into the formation and  
489 dynamics of the microglial population. *Brain Behav Immun.* 69:9-17

490

491 Bagasrawala I, Memi F, V. Radonjić N, Zecevic N. 2016. N -Methyl d-Aspartate Receptor  
492 Expression Patterns in the Human Fetal Cerebral Cortex. *Cereb Cortex.* 11:5041-5053.

493

494 Bar-Shira O, Maor R, Chechik G. 2015. Expression Switching of Receptor Subunits in Human Brain  
495 Development. *PLOS Comput Biol* 11:31004559.

496

497 Barria A, Malinow R. 2005. NMDA receptor subunit composition controls synaptic plasticity by  
498 regulating binding to CaMKII. *Neuron.* 48:289–301.

499

500 Bayés A, Collins MO, Galtrey CM, Simonnet C, Roy M, Croning M, Gou G, van de Lagemaat LN,  
501 Milward D, Whittle IR, Smith C, Choudhary JS, Grant S. 2014. Human post-mortem synapse  
502 proteome integrity screening for proteomic studies of postsynaptic complexes. *Mol Brain.* 7:88.

503

504 Bliss TV, Collingridge GL. 1993. A synaptic model of memory: long-term potentiation in the  
505 hippocampus. *Nature.* 361:31–9.

506

507 Chen X, Levy JM, Hou A, Winters C, Azzam R, Sousa AA, Leapman RD, Nicoll RA, Reese TS. 2015.

508 PSD-95 family MAGUKs are essential for anchoring AMPA and NMDA receptor complexes at the  
509 postsynaptic density. *Proc Natl Acad Sci.* 112:E6983–E6992.

510

511 Clayton DA, Mesches MH, Alvarez E, Bickford PC, Browning MD. 2002. A hippocampal NR2B  
512 deficit can mimic age-related changes in long-term potentiation and spatial learning in the  
513 Fischer 344 rat. *J Neurosci.* 22:3628–37.

514

515 Cui Y, Jin J, Zhang X, Xu H, Yang L, Du D, Zeng Q, Tsien JZ, Yu H, Cao X. 2011. Forebrain NR2B  
516 overexpression facilitating the prefrontal cortex long-term potentiation and enhancing working  
517 memory function in mice. *PLoS One.* 6:e20312

518

519 Dumas TC. 2005. Developmental regulation of cognitive abilities: Modified composition of a  
520 molecular switch turns on associative learning. *Prog Neurobiol.* 76:189–211.

521

522 Finardi A, Gardoni F, Bassanini S, Lasio G, Cossu M, Tassi L, Caccia C, Taroni F, LoRusso G, Di Luca  
523 M, Battaglia G. 2006. NMDA receptor composition differs among anatomically diverse  
524 malformations of cortical development. *J Neuropathol Exp Neurol.* 65:883–93.

525

526 Fischer G, Mutel V, Trube G, Malherbe P, Kew JNC, Mohacsi E, Heitz MP, Kemp JA. 1997. Ro 25-  
527 6981, a Highly Potent and Selective Blocker of N-Methyl-D-aspartate Receptors Containing the  
528 NR2B Subunit. Characterization in Vitro. *J Pharm and Exp Ther.* 283:1285–1292

529

530 Freitas C, Perez J, Knobel M, Tormos JM, Oberman L, Eldaief M, Bashir S, Vernet M, Peña-Gómez  
531 C, Pascual-Leone A. 2011. Changes in cortical plasticity across the lifespan. *Front Aging Neurosci.*



532 3:5.

533

534 Hardingham GE, Bading H. 2010. Synaptic versus extrasynaptic NMDA receptor signalling:

535 implications for neurodegenerative disorders *Nature Review Neurosci.* 11:682-696.

536

537 Hedegaard MK, Hansena KB, Andersena KT, Bräuner-Osborne H, Traynelis SF. 2013.

538 Molecular pharmacology of human NMDA receptors. *Neurochem Int.* 61:601–609.

539

540 Hildebrand ME, Pitcher GM, Harding EK, Li H, Beggs S, Salter MW. 2014. GluN2B and GluN2D

541 NMDARs dominate synaptic responses in the adult spinal cord. *Sci Rep.* 4:4094.

542

543 Jantzie LL, Talos DM, Jackson MC, Park H-K, Graham D a, Lechpammer M, Folkerth RD, Volpe JJ,

544 Jensen FE. 2013. Developmental Expression of N-Methyl-D-Aspartate (NMDA) Receptor Subunits

545 in Human White and Gray Matter: Potential Mechanism of Increased Vulnerability in the

546 Immature Brain. *Cereb Cortex.* 25:482-495.

547

548 Kiss JP, Szasz BK, Fodor L, Mike A, Lenkey N, Kurkó D, Nagy J, Vizi ES. 2012. GluN2B-containing

549 NMDA receptors as possible targets for the neuroprotective and antidepressant effects of

550 fluoxetine. *Neurochem Int.* 60:170–176.

551

552 Kohl MM, Shipton OA, Deacon RM, Rawlins JNP, Deisseroth K, and Paulsen O. 2013. Hemisphere-

553 specific optogenetic stimulation reveals left-right asymmetry of hippocampal plasticity. *Nat*

554 *Neurosci.* 14: 1413–1415

555

556 Lussier MP, Sanz-Clemente A, Roche KW. 2015. Dynamic Regulation of NMDA and AMPA  
557 Receptors by Posttranslational Modifications. *J Biol Chem.* 290:28596–28603.  
558  
559 Magnusson KR, Brim BL, Das SR. 2010. Selective vulnerabilities of N-methyl-D-aspartate (NMDA)  
560 receptors during brain aging. *Front. Aging Neurosci.* 2:11.  
561  
562 Magnusson KR. 2012. Aging of the NMDA receptor: from a mouse's point of view. *Future Neurol.*  
563 7:627-637.  
564  
565 Mierau SB, Meredith RM, Upton AL, Paulsen O. 2004. Dissociation of experience-dependent and  
566 -independent changes in excitatory synaptic transmission during development of barrel cortex.  
567 *Proc Natl Acad Sci.* 101:15518–15523.  
568  
569 Morrison JH, Baxter MG. 2012. The ageing cortical synapse: hallmarks and implications for  
570 cognitive decline. *Nat Rev Neurosci.* 13:240–50.  
571  
572 Mostany R, Anstey JE, Crump KL, Maco B, Knott G, Portera-Cailliau C. 2013. Altered Synaptic  
573 Dynamics during Normal Brain Aging. *J Neurosci.* 33:4094–4104.  
574  
575 Paoletti P, Bellone C, Zhou Q. 2013. NMDA receptor subunit diversity: impact on receptor  
576 properties, synaptic plasticity and disease. *Nat Rev Neurosci.* 14:383–400.  
577  
578 Perry VH, Nicoll JAR, Holmes C. 2010. Microglia in neurodegenerative disease. *Nat Rev Neurol.*  
579 6:193–201.

580

581 Rauner C, Köhr G. 2011. Triheteromeric NR1/NR2A/NR2B receptors constitute the major N-

582 methyl-D-aspartate receptor population in adult hippocampal synapses. *J Biol Chem.* 286:7558–

583 66.

584

585 Singh-Manoux A, Kivimaki M, Glymour MM, Elbaz A, Berr C, Ebmeier KP, Ferrie JE, Dugravot A.

586 2012. Timing of onset of cognitive decline: results from Whitehall II prospective cohort study.

587 *BMJ* 344:d7622–d7622.

588

589 Stocca G, Vicini S. 1998. Increased contribution of NR2A subunit to synaptic NMDA receptors in

590 developing rat cortical neurons. *J Physiol.* 507:13–24.

591

592 Stroebel D, Casado M, Paoletti P. 2018. Triheteromeric NMDA receptors: from structure to

593 synaptic physiology. *Curr Opin Physiol.* 2:1.

594

595 Takeuchi T, Duzskiewicz AJ, Morris RGM. 2013. The synaptic plasticity and memory hypothesis:

596 encoding, storage and persistence. *Philos Trans R Soc B Biol Sci.* 369:20130288.

597

598 Tang YP, Shimizu E, Dube GR, Rampon C, Kerchner G a, Zhuo M, Liu G, Tsien JZ. 1999. Genetic

599 enhancement of learning and memory in mice. *Nature.* 401:63–69.

600

601 Vargas-Caballero M, Robinson HPC. 2004. Fast and slow voltage-dependent dynamics of

602 magnesium block in the NMDA receptor: the asymmetric trapping block model. *J Neurosci.*

603 24:6171–6180.

604

605 Vargas-Caballero M, Martin LJ, Salter MW, Orser BA, Paulsen O. 2010. Alpha-5 Subunit-

606 containing GABAA receptors mediate a slowly decaying inhibitory synaptic current in CA1

607 pyramidal neurons following Schaffer collateral activation. *Neuropharmacology*. 58:668–675.

608

609 Vargas-Caballero M, Willaime-Morawek S, Gomez-Nicola D, Perry VH, Bulters D, Mudher A. 2016.

610 The use of human neurons for novel drug discovery in dementia research. *Expert Opin Drug*

611 *Discov*. 0441:17460441.2016.1154528.

612

613 Verhoog MB, Goriounova NA, Obermayer J, Stroeder J, Hjorth JJJ, Testa-Silva G, Baayen JC, de

614 Kock CPJ, Meredith RM, Mansvelder HD. 2013. Mechanisms Underlying the Rules for Associative

615 Plasticity at Adult Human Neocortical Synapses. *J Neurosci*. 33:17197–17208.

616

617 Vicini S, Wang JF, Li JH, Zhu WJ, Wang YH, Luo H, Wolfe BB, Grayson DR, Otis JM, Fitzgerald MK,

618 Mueller D. 1998. Functional and Pharmacological Differences Between Recombinant N –

619 Methyl-d-Aspartate Receptors Functional and Pharmacological Differences Between

620 Recombinant N -Methyl- D -Aspartate Receptors. *J Neurophysiol*. 79:555–566.

621

622 Wang H, Stradtman GG, Wang XJ, Gao WJ. 2008. A specialized NMDA receptor function in layer 5

623 recurrent microcircuitry of the adult rat prefrontal cortex. *Proc Natl Acad Sci*. 105:16791–6.

624

625 Warming H, Pegasiou C, Pitera AP, Kariis H, Houghton SD, Kurbatskaya K, Ahmed A, Grundy P,

626 Vajramani G, Bulters D, Altafaj X, Deinhardt K, Vargas-caballero M. 2019. A primate-specific short

627 GluN2A-NMDA receptor isoform is expressed in the human brain. *Molecular Brain*. 12:64.

628

629 Wu HY, Yuen EY, Lu YF, Matsushita M, Matsui H, Yan Z, Tomizawa K. 2005. Regulation of N-

630 methyl-D-aspartate receptors by calpain in cortical neurons. *J Biol Chem.* 280:21588–93.

631

632 Yashiro K, Philpot BD. 2009. Regulation of NMDA receptor subunit expression and its implications

633 for LTD, LTP, and metaplasticity. *Neuropharmacology.* 55:1081–1094.

634

635 Ying Z, Bingaman W, Najm IM. 2004. Increased Numbers of Coassembled PSD-95 to NMDA-

636 receptor Subunits NR2B and NR1 in Human Epileptic Cortical Dysplasia. *Epilepsia.* 45:314–321.

637

638 Zhao X, Rosenke R, Kronemann D, Brim B, Das SR, Dunah a. W, Magnusson KR. 2009. The effects

639 of aging on N-methyl-d-aspartate receptor subunits in the synaptic membrane and relationships

640 to long-term spatial memory. *Neuroscience.* 162:933–945.

641

642 Zhang W-B, Ross PJ, Tu Y, Wang Y, Beggs S, Sengar AS, Ellis J, Salter MW. 2016. Fyn Kinase

643 regulates GluN2B subunit-dominant NMDA receptors in human induced pluripotent stem cell-

644 derived neurons. *Sci Rep.* 6:23837.

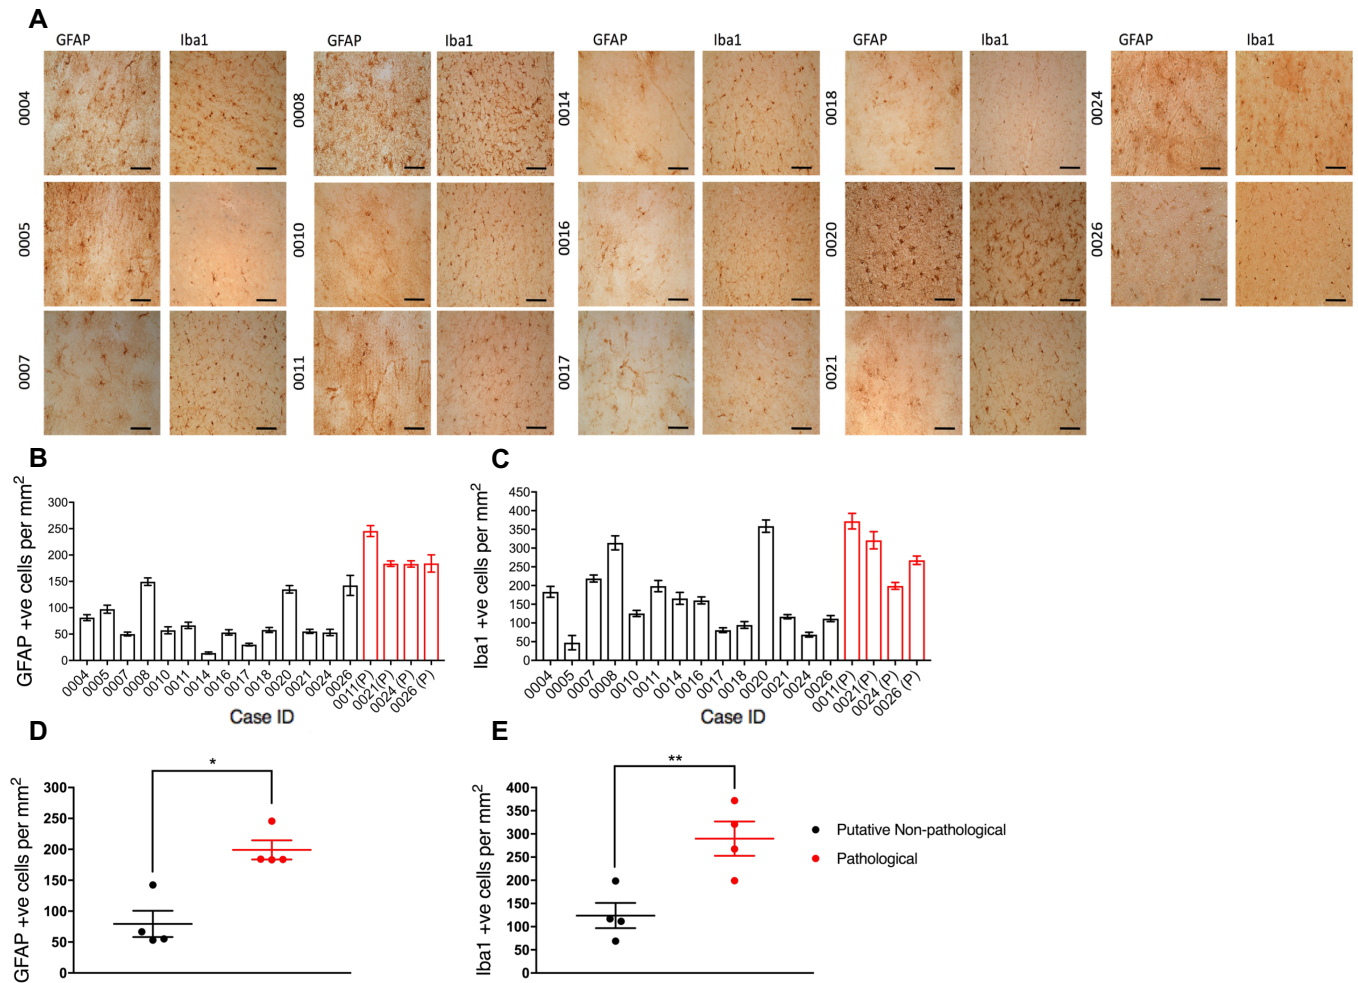

645

646 Supplementary Figure 1. Representative images of immunohistochemical analyses for cases

647 stained for GFAP and Iba1 (A). Cell density quantification for non-pathological (PNP) and

648 pathological (P) tissue, for GFAP (B), and Iba1 (C). Data were analysed using one-way ANOVA

649 with Dunnett's post-hoc correction comparing against the mean of pathological cases. Cases

650 0008 and 0020 did not meet the criteria for subsequent analyses, as they were not significantly

651 different to the mean of pathological cases (for Iba1). Paired comparison of cell densities for

652 GFAP (D) and Iba1 (E) for putative non-pathological (PNP) tissue for which pathological (P) tissue

653 was available (cases 0011, 0021, 0024 and 0026). Significantly lower densities for both GFAP and

654 Iba1 positive cells revealed by paired t-tests ( $P = 0.0247$  and  $P = 0.0018$  respectively).

655  
656  
657  
658  
659  
660

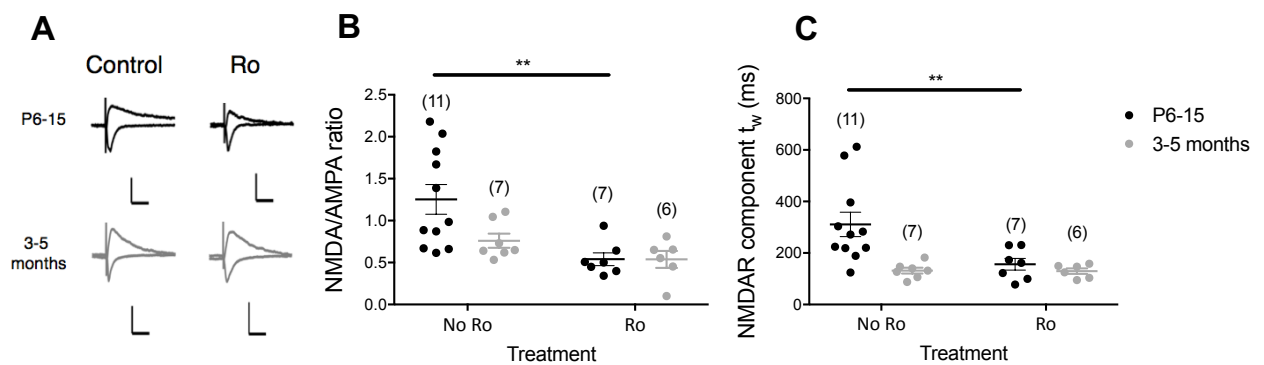

661

662 Supplementary Figure 2.

663 Significant GluN2B contribution in NMDA-mediated currents in temporal brain slices recorded

664 from P6-15 mice but not from 3-5 month old (adult) mice. (A) Representative NMDAR- and

665 AMPAR-mediated currents from P6-15 and 3- 5 month-old mice with and without Ro 25-6981

666 treatment. (B) NMDA/AMPA ratios from P6-15 mice show sensitivity to Ro treatment, while

667 recordings from 3-5-month-old mice do not. (C) Weighted NMDA time constant ( $\tau_w$ ) shows

668 sensitivity to Ro treatment in P6-15 mice. No differences were observed in the 3-5-month-old

669 mice. Numbers in brackets correspond to number of cells recorded from a minimum of 4 mice.

670 Scale bars in (A): 50ms, 100pA.

671

672
